# Supplementary material for: Cyclic poly(l-lactide)s via ring-expansion polymerizations catalysed by 2,2-dibutyl-2-stanna-1,3-dithiolane
Source: Royal Society of Chemistry journal article supplement (doi:10.1039/c6py02166b), 2017-01-01

## Supplemental Information

### MALDI mass spectra of polymers listed in

**Table 1**

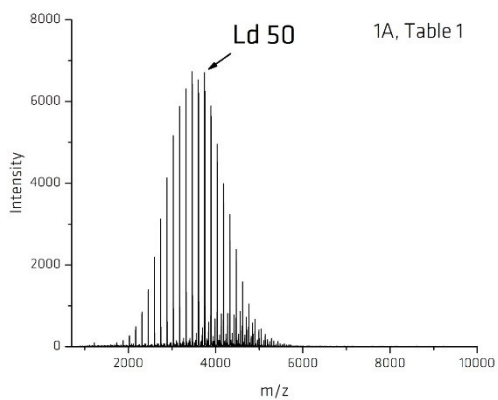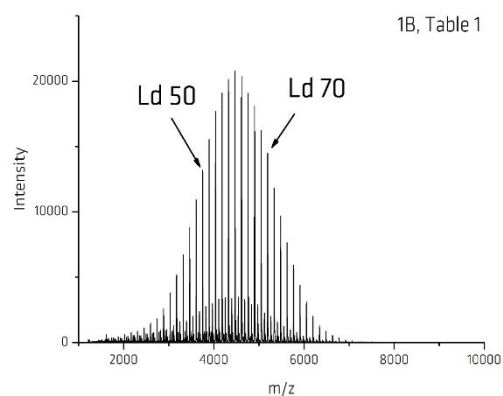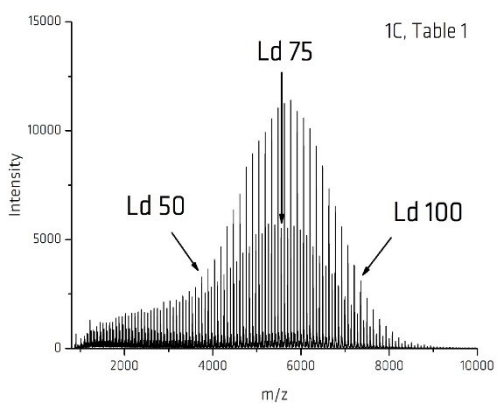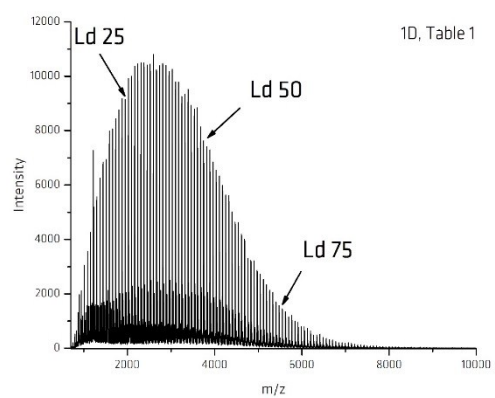

**Table 2**

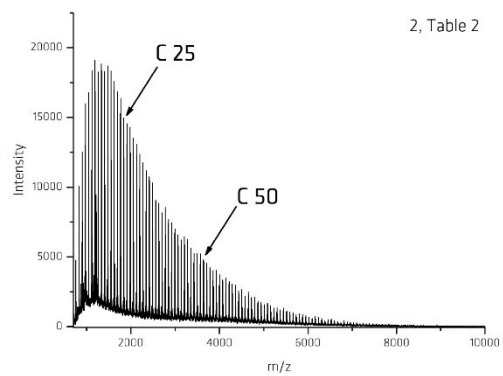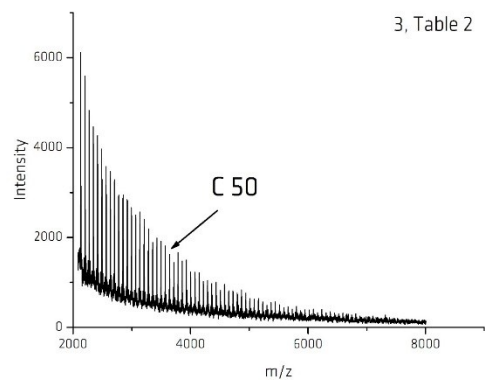

### Table 3

1, Table 3

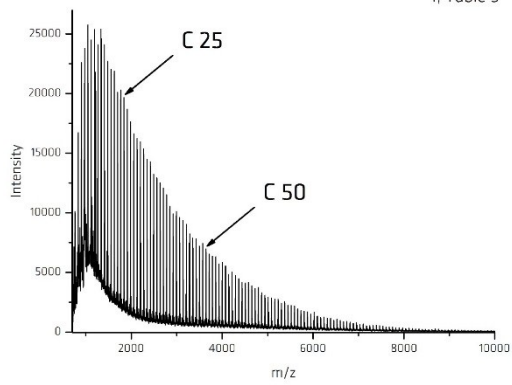

3, Table 3

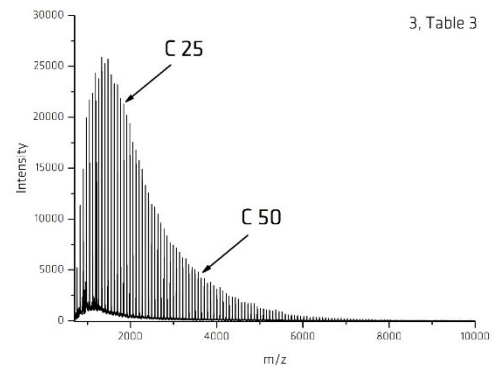

5B, Table 3

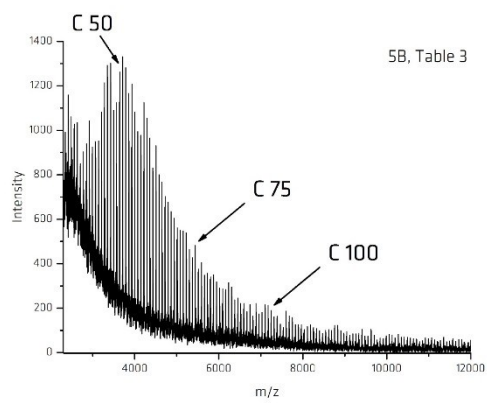

6A, Table 3

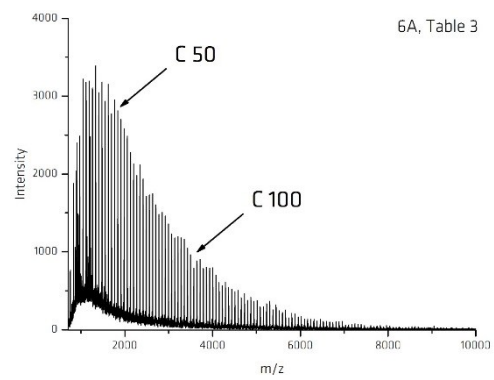

6B, Table 3

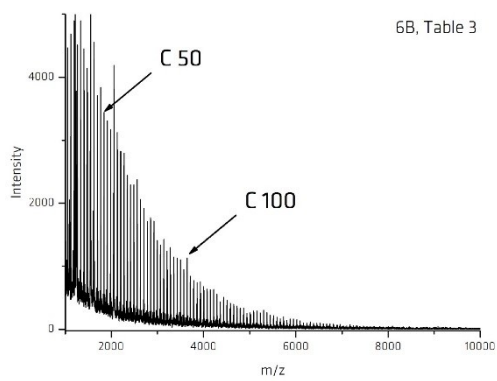

7B, Table 3

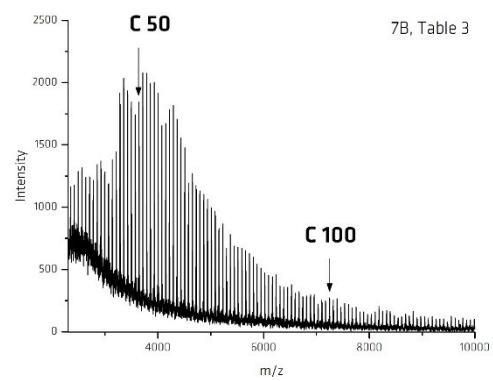

**Table 4**

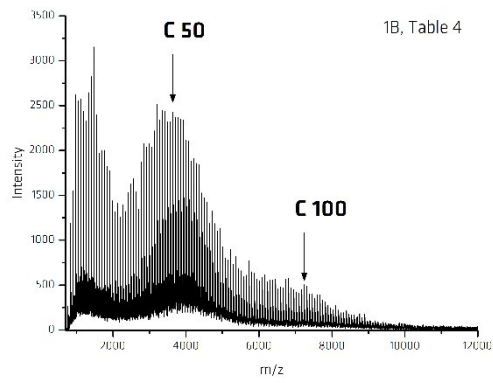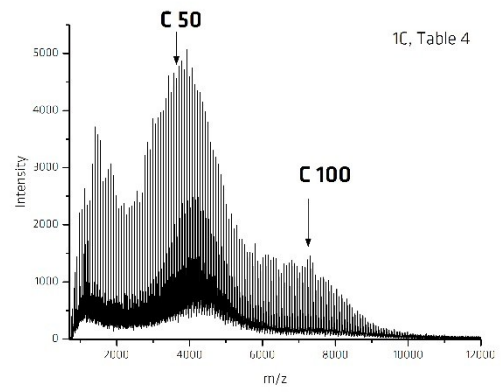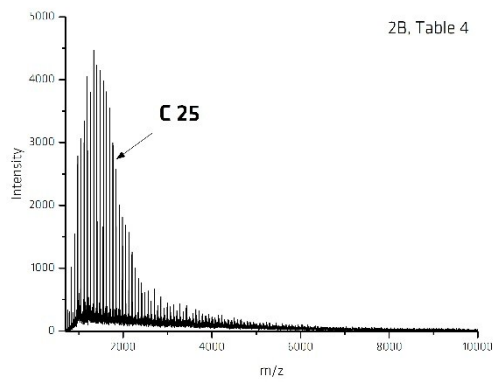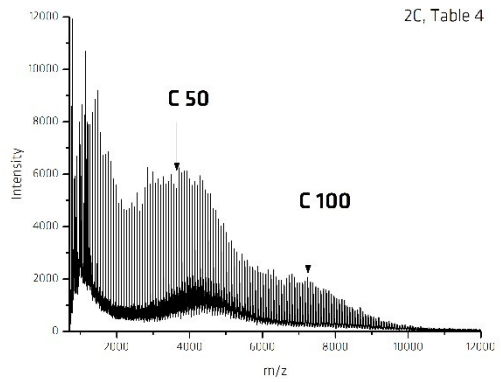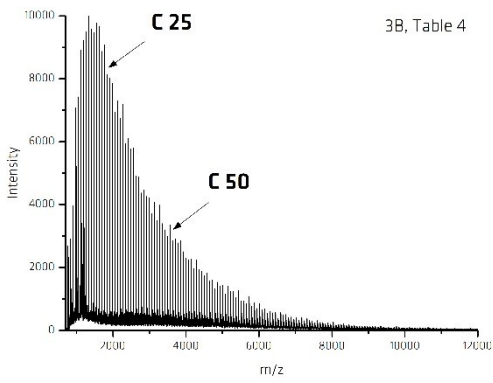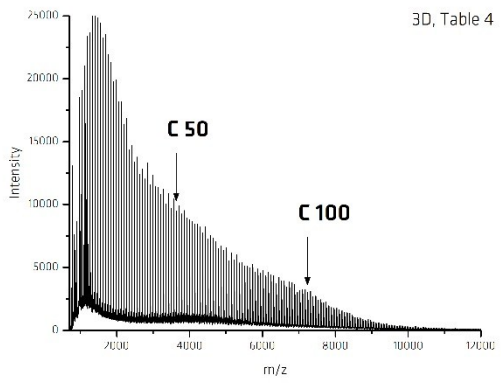

# <sup>1</sup>H-NMR spectra of samples listed in Table 3

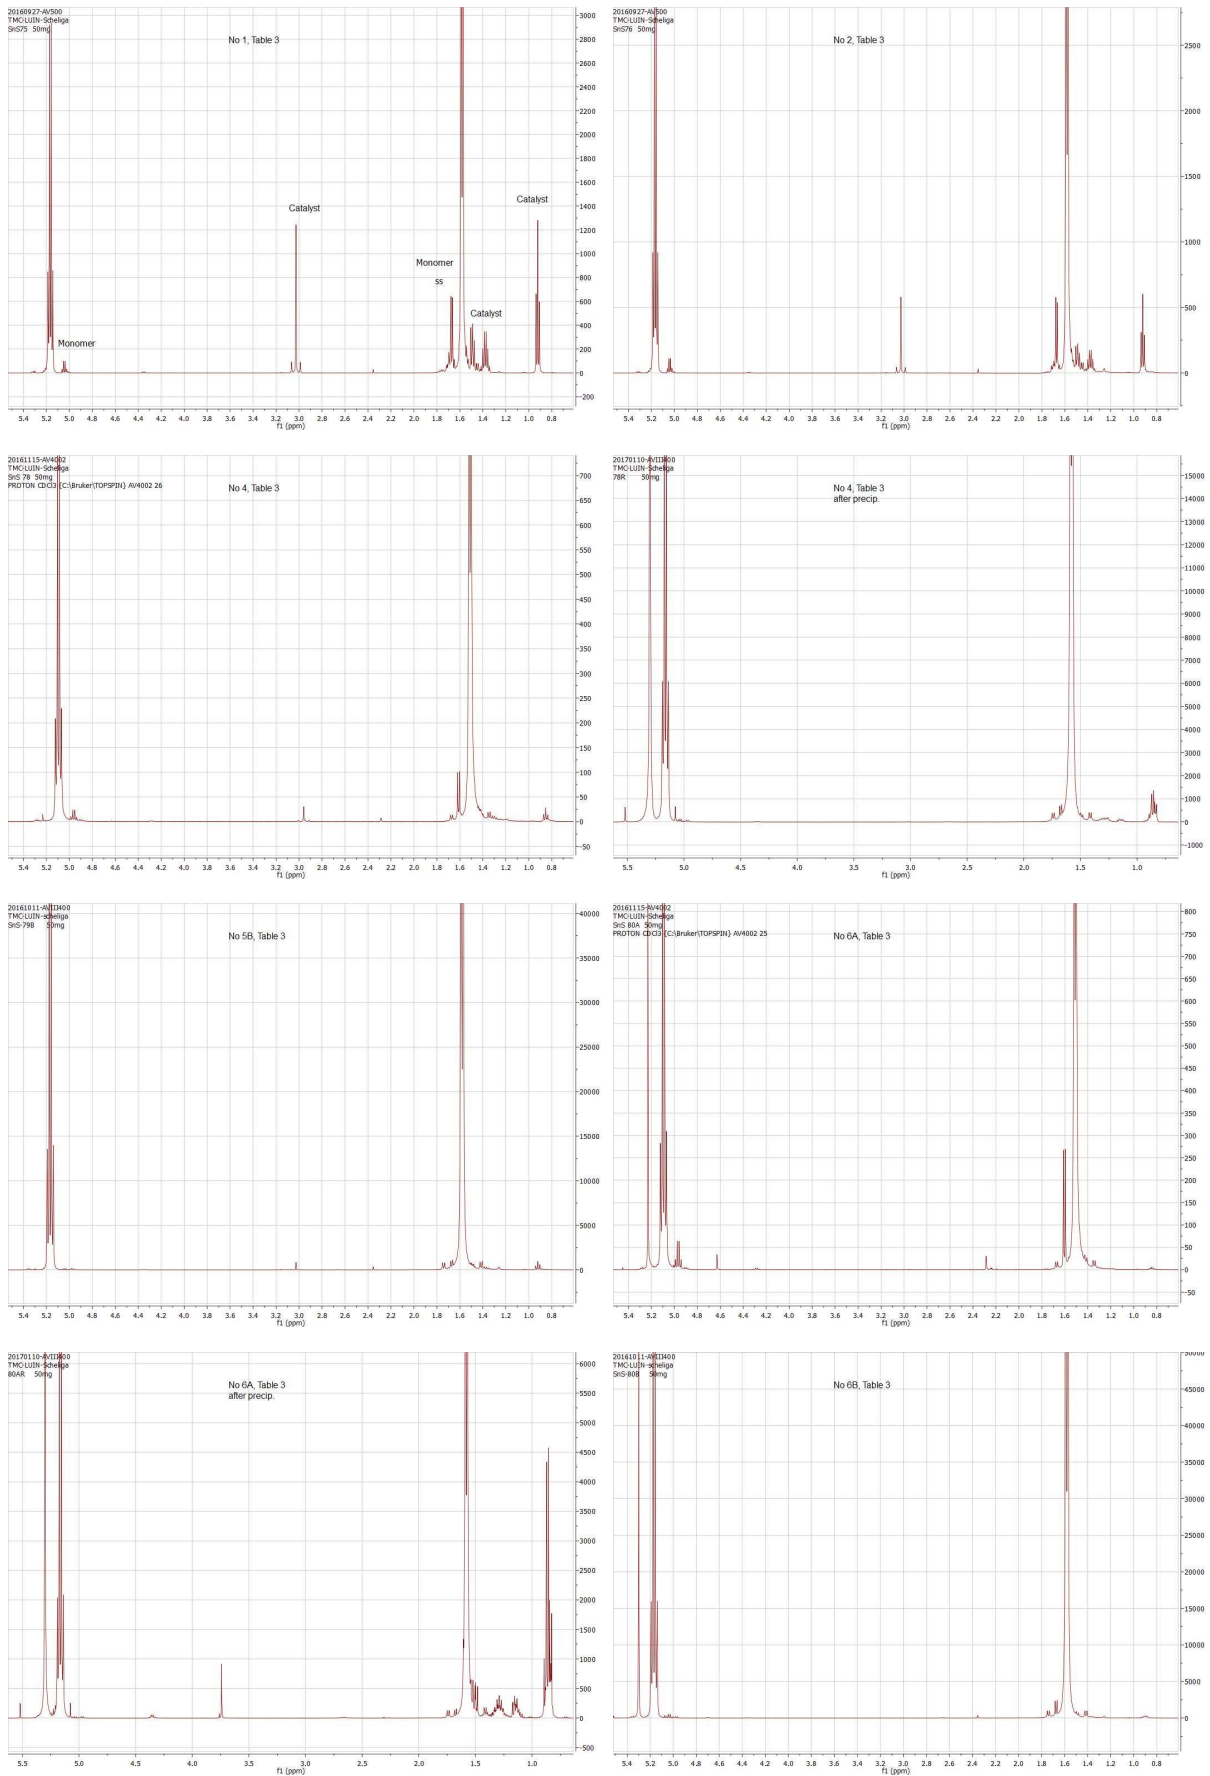

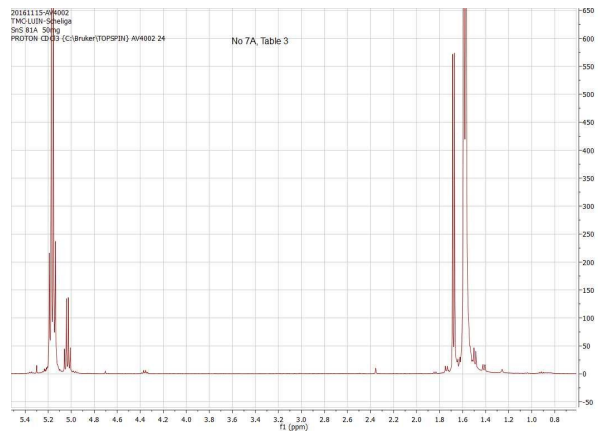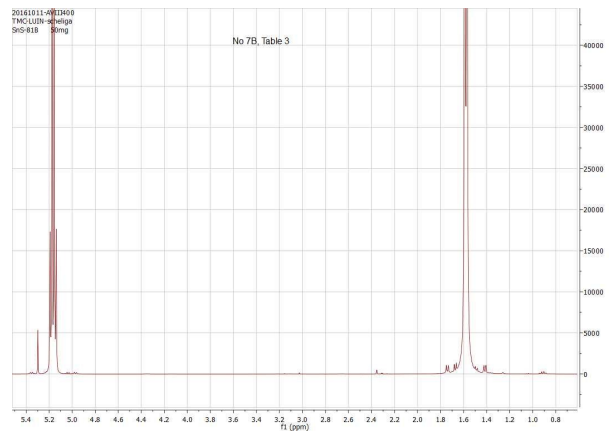

Supplement: c6py02166b1.pdf [file c6py02166b1.pdf]
